# Supplementary material for: Identification of novel, cryptic Clostridioides species isolates from environmental samples collected from diverse geographical locations
Source: PubMed Central journal article supplement (PMC8942030; doi:10.1099/mgen.0.000742), 2022-02-15
Supplement: mgen-8-0742-s001.pdf [file mgen-8-0742-s001.pdf]

Supplementary figures and table information for “Identification of novel, cryptic *Clostridioides* species isolates from environmental samples collected from diverse geographical locations”

Supplemental Figures

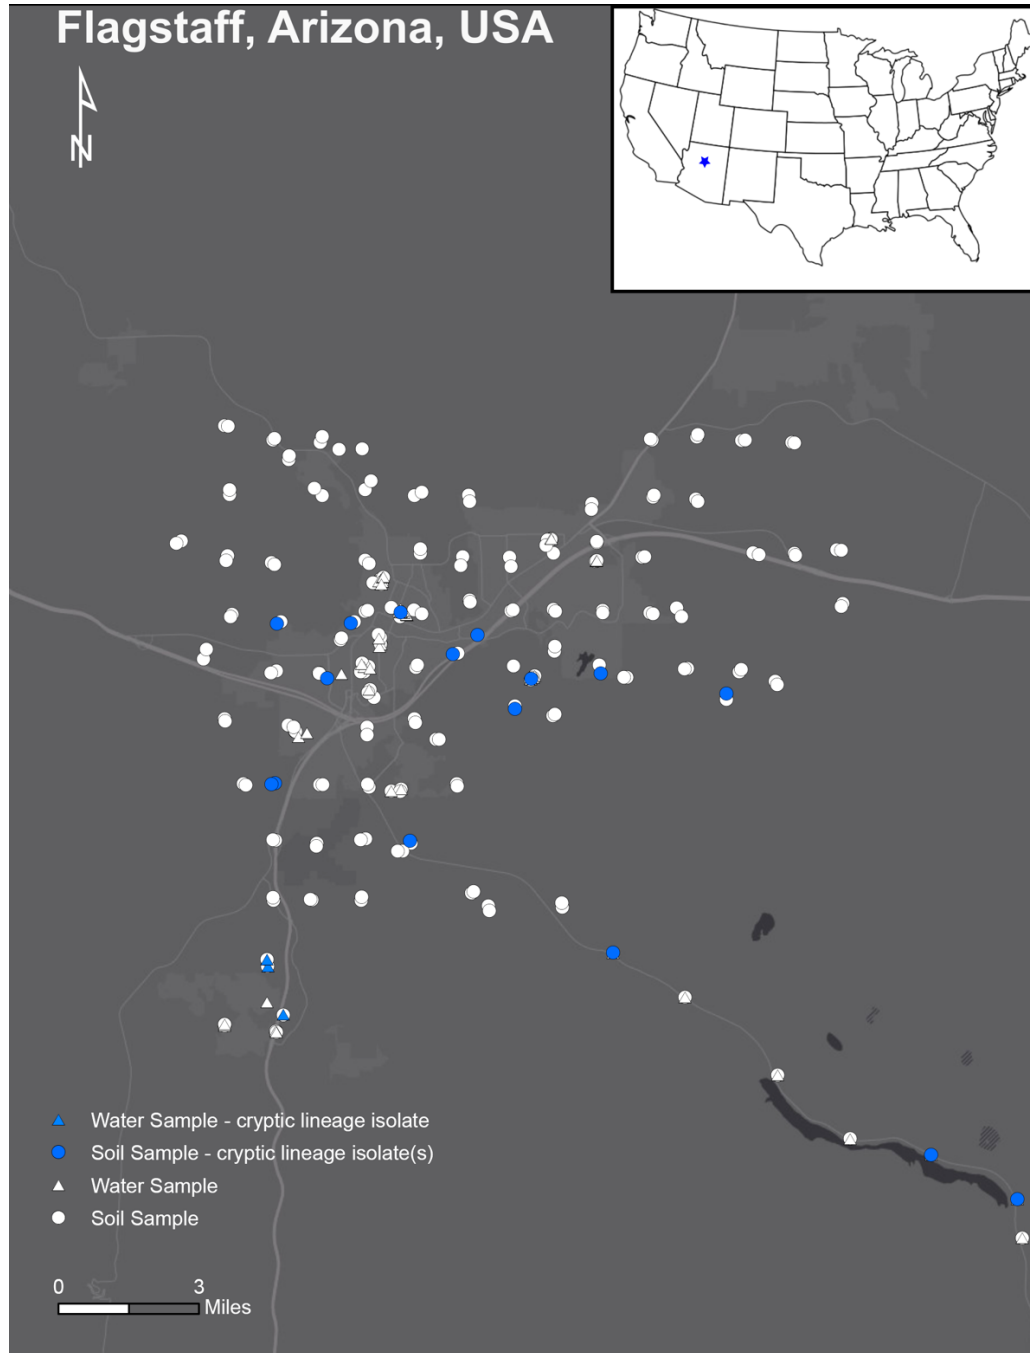

**Figure S1.** Map of sampling sites for detection of *C. difficile* and cryptic lineage isolates in environmental samples in Flagstaff, Arizona, USA. Triangles denote water samples; circles denote soil samples. Samples from which cryptic lineages were isolated are highlighted in blue.

| Genome       | Plasmids  |           |           |            |            |            |            | Phage    |            |            |              |              |           | Clade |           |
|--------------|-----------|-----------|-----------|------------|------------|------------|------------|----------|------------|------------|--------------|--------------|-----------|-------|-----------|
|              | pESS1070b | pESS1070c | pESS1070d | pESS17301a | pESS17301c | pESS17301d | pESS17301e | pESW1602 | LN881534.1 | KX905163.1 | ES-S-0173-01 | ES-S-0107-01 | pCD5401_3 |       | pCD1802_4 |
| ES-S-0173-01 | 10        | 3         | 1         | 100        | 100        | 100        | 100        | 0        | 3          | 3          | 100          | 0            | 4         | 1     | C-III     |
| ES-S-0001-02 | 6         | 0         | 13        | 0          | 16         | 12         | 6          | 0        | 65         | 46         | 1            | 0            | 8         | 1     | C-III     |
| ES-S-0001-03 | 22        | 0         | 19        | 0          | 51         | 73         | 79         | 2        | 68         | 57         | 4            | 0            | 16        | 3     | C-III     |
| ES-S-0005-03 | 11        | 0         | 2         | 0          | 100        | 73         | 5          | 95       | 22         | 4          | 100          | 0            | 6         | 2     | C-III     |
| ES-S-0006-03 | 8         | 0         | 3         | 0          | 16         | 25         | 12         | 1        | 68         | 54         | 19           | 9            | 6         | 45    | C-III     |
| ES-S-0123-01 | 9         | 0         | 30        | 0          | 4          | 7          | 1          | 0        | 69         | 2          | 0            | 0            | 10        | 2     | C-III     |
| ES-W-0016-02 | 3         | 0         | 1         | 0          | 2          | 0          | 0          | 100      | 24         | 5          | 3            | 2            | 4         | 100   | C-III     |
| ES-W-0017-02 | 10        | 0         | 16        | 0          | 16         | 27         | 42         | 2        | 3          | 63         | 69           | 14           | 32        | 37    | C-III     |
| ES-W-0018-02 | 10        | 0         | 16        | 0          | 16         | 27         | 42         | 2        | 3          | 63         | 69           | 14           | 31        | 37    | C-III     |
| ZZV13-5731   | 6         | 0         | 14        | 0          | 1          | 30         | 14         | 2        | 74         | 100        | 2            | 2            | 8         | 3     | C-III     |
| ZZV14-5902   | 7         | 21        | 31        | 3          | 2          | 31         | 20         | 2        | 2          | 100        | 28           | 17           | 4         | 28    | C-III     |
| ZZV14-6009   | 4         | 0         | 4         | 0          | 2          | 3          | 44         | 2        | 1          | 100        | 34           | 16           | 10        | 30    | C-III     |
| ZZV14-6044   | 6         | 55        | 29        | 3          | 2          | 32         | 49         | 2        | 74         | 100        | 3            | 2            | 5         | 4     | C-III     |
| ZZV14-6045   | 9         | 1         | 31        | 0          | 2          | 31         | 13         | 74       | 73         | 100        | 27           | 18           | 5         | 28    | C-III     |
| ZZV14-6048   | 6         | 20        | 16        | 3          | 2          | 30         | 45         | 2        | 2          | 100        | 38           | 15           | 4         | 35    | C-III     |
| ZZV14-6104   | 4         | 0         | 6         | 0          | 2          | 30         | 5          | 2        | 74         | 100        | 3            | 2            | 4         | 3     | C-III     |
| ZZV14-6105   | 4         | 0         | 11        | 0          | 5          | 0          | 0          | 2        | 73         | 72         | 2            | 1            | 3         | 3     | C-III     |
| ZZV14-6150   | 2         | 0         | 4         | 0          | 2          | 3          | 42         | 2        | 59         | 100        | 13           | 22           | 4         | 14    | C-III     |
| ZZV14-6154   | 3         | 0         | 5         | 0          | 1          | 30         | 4          | 2        | 75         | 1          | 2            | 1            | 9         | 4     | C-III     |
| ES-S-0107-01 | 100       | 100       | 100       | 5          | 3          | 19         | 2          | 1        | 1          | 4          | 2            | 100          | 15        | 4     | C-IV      |
| ES-S-0108-01 | 100       | 100       | 100       | 5          | 3          | 20         | 2          | 1        | 1          | 4          | 2            | 100          | 14        | 4     | C-IV      |
| ES-S-0054-01 | 10        | 3         | 0         | 1          | 1          | 0          | 2          | 1        | 1          | 0          | 2            | 1            | 190       | 1     | C-IV      |
| ES-S-0056-01 | 12        | 3         | 0         | 1          | 1          | 2          | 2          | 1        | 3          | 2          | 2            | 2            | 87        | 1     | C-IV      |
| ES-S-0077-01 | 12        | 3         | 3         | 1          | 1          | 2          | 2          | 1        | 3          | 2          | 2            | 2            | 87        | 1     | C-IV      |

**Figure S2.** Breadth of coverage values obtained from mapping sequencing reads for all genomes sequenced as part of this study to extrachromosomal elements.

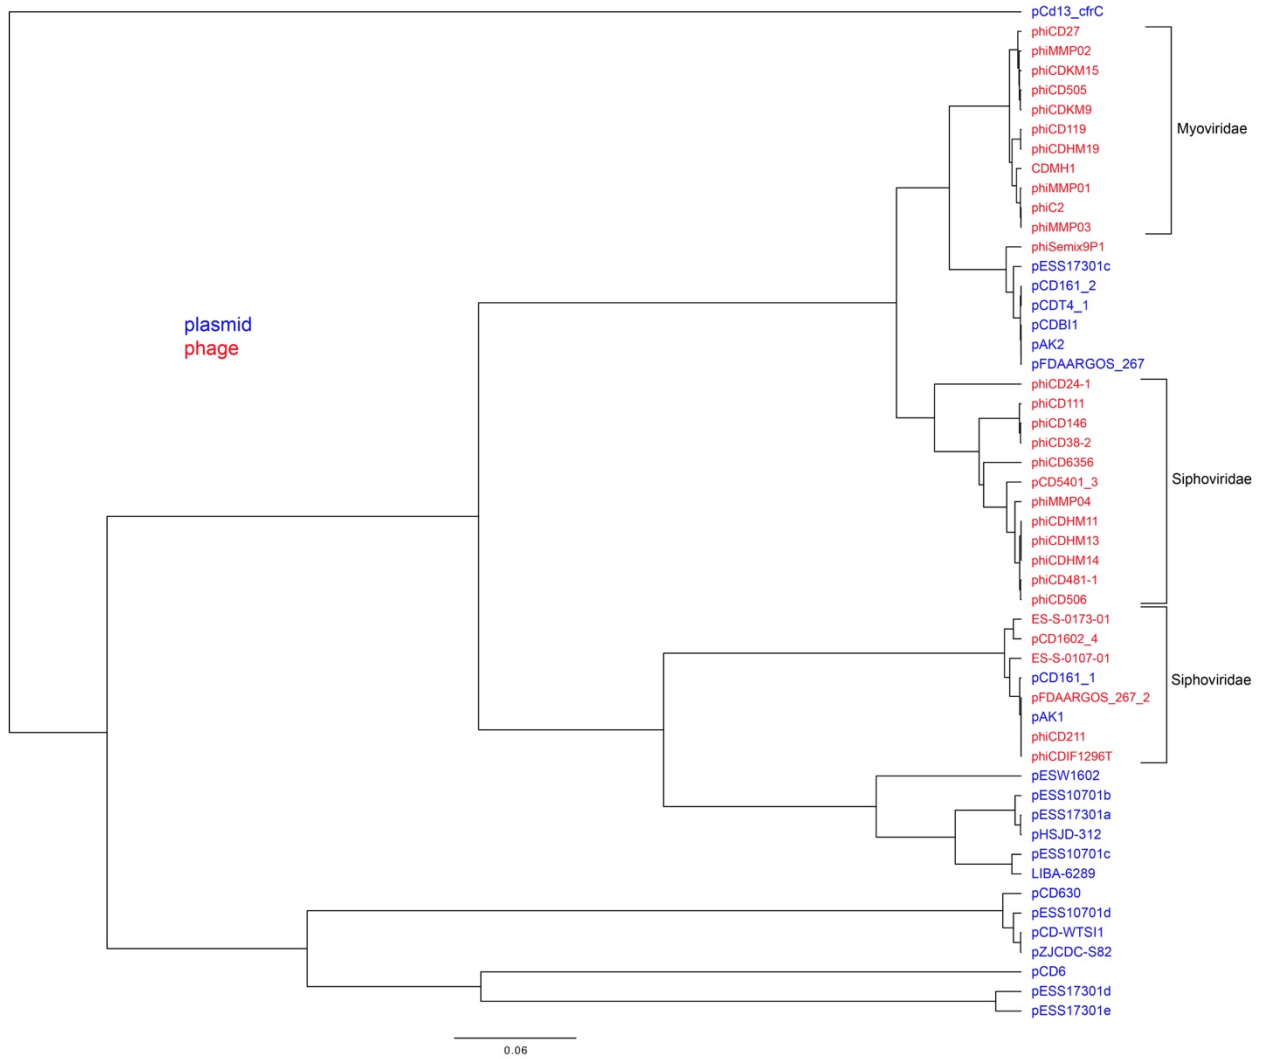

**Figure S3.** Dendrogram displaying relationships of extrachromosomal elements based on pairwise MASH distances.

- C. difficile
- C-I
- C-II
- C-III
- C-IV
- C-V
- C. mangenotii

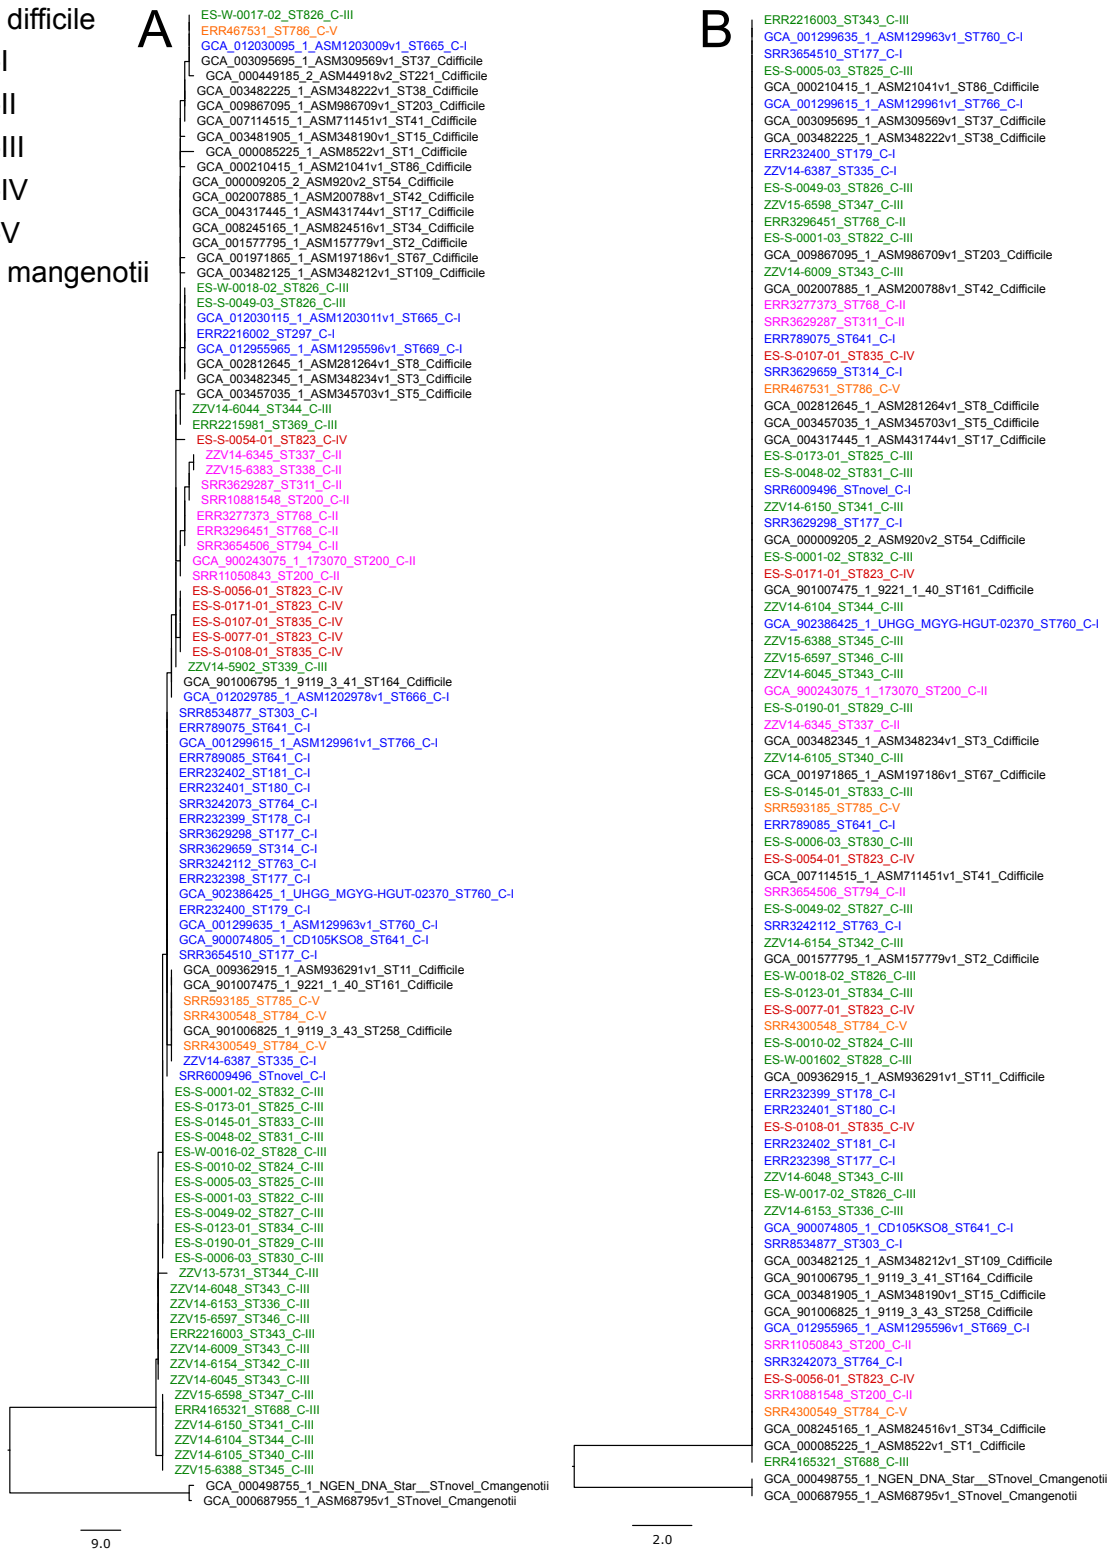

**Figure S4.** A) Phylogeny of near-full-length 16S rRNA sequences. B) Phylogeny of ~300bp V4 region of the 16S rRNA gene.

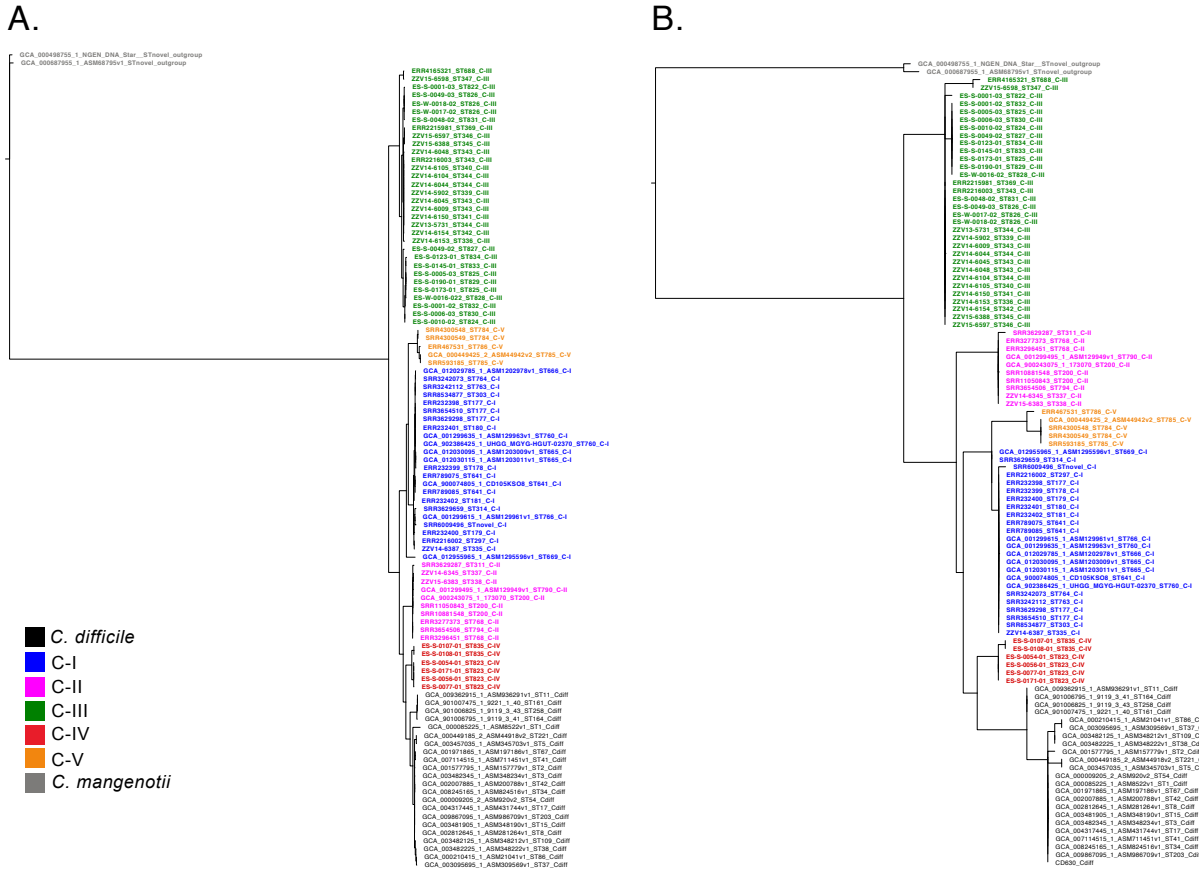

**Figure S5.** A) Phylogeny of near-full-length *rpoB* gene sequences extracted from genome assemblies. B) Phylogeny of 300bp region of the *rpoB* gene identified by Phylomark as a potential marker suitable for delineating cryptic species.

## Supplemental Tables

Supplemental tables are available as an additional file (spreadsheet with multiple tabs).

**Table S1.** Accession numbers and genome assembly information for newly sequenced genomes.

**Table S2.** Accession numbers and genome assembly information for publicly available genomes included in this study.

**Table S3.** Primers for PCR assays investigated in this study.

**Table S4.** Average nucleotide identity values generated with PYANI.

**Table S5.** Lineage-specific sequences identified for cryptic clades using LS-BSR.

**Table S6.** Annotation information for lineage-specific coding regions and lost coding coding regions associated with clade C-III.

**Table S7.** Mutations in *gyrB* associated with fluoroquinolone resistance identified for cryptic group isolates.

**Table S8.** Results of *in silico* screen of primers for PCR assays investigated in this study.
